# Supplementary material for: Classification and Multifaceted Potential of Secondary Metabolites Produced by Bacillus subtilis Group: A Comprehensive Review
Source: MDPI journal article supplement (doi:10.3390/molecules28030927), 2023-01-17
Supplement: s1 [file s1]

## **Classification and Multifaceted potential of secondary Metabolites**

### **Produced by *Bacillus subtilis* group: A Comprehensive Review**

Sajid Iqbal<sup>1\*</sup>, Farida Begum<sup>2</sup>, Ali A. Rabaan<sup>3,4,5</sup>, Mohammed Aljeldah<sup>6</sup>, Basim R. Al Shammari<sup>6</sup>, Abdulsalam Alawfi<sup>7</sup>, Amer Alshengeti<sup>7, 8</sup>, Tarek Sulaiman<sup>9</sup>, Alam Khan<sup>10</sup>

#### **Affiliations:**

<sup>1</sup> Atta-ur-Rahman School of Applied Biosciences, National University of Sciences and Technology (NUST), Islamabad, Pakistan

<sup>2</sup> Department of Biochemistry, Abdul Wali Khan University Mardan (AWKUM), Khyber Pakhtunkhwa, Pakistan

<sup>3</sup> Molecular Diagnostic Laboratory, Johns Hopkins Aramco Healthcare, Dhahran 31311, Saudi Arabia

<sup>4</sup> College of Medicine, Alfaisal University, Riyadh 11533, Saudi Arabia

<sup>5</sup> Department of Public Health and Nutrition, The University of Haripur, Haripur 22610, Pakistan

<sup>6</sup> Department of Clinical Laboratory Sciences, College of Applied Medical Sciences, University of Hafr Al Batin, Hafr Al Batin 39831, Saudi Arabia

<sup>7</sup> Department of Pediatrics, College of Medicine, Taibah University, Al-Madinah 41491, Saudi Arabia

<sup>8</sup> Department of Infection prevention and control, Prince Mohammad Bin Abdulaziz Hospital, National Guard Health Affairs, Al-Madinah 41491, Saudi Arabia

<sup>9</sup> Infectious Diseases Section, Medical Specialties Department, King Fahad Medical City, Riyadh 12231, Saudi Arabia.

<sup>10</sup> Department of Life Sciences, Abasyn University Islamabad campus, Islamabad, Pakistan

\*Corresponding: Sajid Iqbal

Email; siqbal.phdabs12asab@asab.nust.edu.pk; sajidiqbalm44@yahoo.com

Phone number: +923139591716

**Table S1:** NRPs from *B. subtilis* group.

| NRPs class         | Sub-class | Metabolites      | Antimicrobial activity |           |            |       | References |
|--------------------|-----------|------------------|------------------------|-----------|------------|-------|------------|
|                    |           |                  | Antibacterial          |           | Antifungal | Other |            |
|                    |           |                  | Gram +ive              | Gram -ive |            |       |            |
| Cyclic lipopeptide | Fengycin  | Agrastatin A     | -                      | -         | +          | -     | [1]        |
| Cyclic lipopeptide | Fengycin  | Fengycin         | -                      | -         | +          | -     | [2,3,4]    |
| Cyclic lipopeptide | Fengycin  | Fengycin A       | -                      | -         | +          | -     | [5]        |
| Cyclic lipopeptide | Fengycin  | Fengycin B       | -                      | -         | +          | -     | [6]        |
| Cyclic lipopeptide | Fengycin  | Fengycin C, D, S | -                      | -         | +          | -     | [5]        |
| Cyclic lipopeptide | Fengycin  | Plipastatin      | -                      | -         | +          | -     | [7]        |
| Cyclic lipopeptide | Iturin    | Bacillomycin     | -                      | -         | +          | -     | [8,9]      |
| Cyclic lipopeptide | Iturin    | Bacillomycin D   | -                      | -         | +          | -     | [10]       |
| Cyclic lipopeptide | Iturin    | Bacillomycin F   | -                      | -         | +          | -     | [11]       |
| Cyclic lipopeptide | Iturin    | Bacillomycin L   | -                      | -         | +          | -     | [12]       |
| Cyclic lipopeptide | Iturin    | Bacillomycin Lc  | -                      | -         | +          | -     | [13]       |
| Cyclic lipopeptide | Iturin    | Bacillomycin R   | +                      | -         | +          | -     | [13]       |
| Cyclic lipopeptide | Iturin    | Eumycin          | -                      | -         | +          | -     | [13]       |
| Cyclic lipopeptide | Iturin    | Iturin           | -                      | -         | +          | -     | [2,14]     |
| Cyclic lipopeptide | Iturin    | Iturin A         | -                      | -         | +          | -     | [6,12]     |
| Cyclic lipopeptide | Iturin    | Iturin C         | -                      | -         | +          | -     | [14]       |
| Cyclic lipopeptide | Iturin    | Iturin D, E      | -                      | -         | +          | -     | [13]       |
| Cyclic lipopeptide | Iturin    | Mycosubtilin     | +                      | -         | +          | -     | [12,15]    |
| Cyclic lipopeptide | Iturin    | Subtulene A      | +                      | +         | +          | -     | [16]       |
| Cyclic lipopeptide | Surfactin | Bamylocin A      | -                      | -         | +          | -     | [11,17,18] |
| Cyclic             | Surfactin | Lichenysin       | +                      | +         | +          | -     | [19]       |

|                    |               |                        |   |   |   |           |               |
|--------------------|---------------|------------------------|---|---|---|-----------|---------------|
| lipopeptide        |               |                        |   |   |   |           |               |
| Cyclic lipopeptide | Surfactin     | Lichenysin A           | + | + | - | -         | [20]          |
| Cyclic lipopeptide | Surfactin     | Locillomycin           | + | + | - | Antiviral | [21]          |
| Cyclic lipopeptide | Surfactin     | Pumilacidin A-G        | + | + | - | Antiviral | [22]          |
| Cyclic lipopeptide | Surfactin     | Surfactin              | + | + | + | -         | [2,23,24]     |
| Cyclic lipopeptide | Surfactin     | fengycin               | - | - | + | -         | [22,25,26,27] |
| Cyclic lipopeptide | Surfactin     | Surfactin like peptide | + | + | + | -         | [28,29]       |
| Cyclic lipopeptide | -             | Gageopeptine           | - | - | + | -         | [30]          |
| Cyclic lipopeptide | -             | Bacilotetrins A and B  | + | - | - | -         | [30]          |
| Cyclic lipopeptide | Nonapeptide   | Locillomycins          | + | + | - | Antiviral | [21]          |
| Linear lipopeptide | Gageopeptide  | Gageotetrine A-C       | - | - | + | -         | [30]          |
| Linear lipopeptide | -             | Gageostatins           | - | - | + | -         | [30]          |
| Linear lipopeptide | Siderophore   | Bacillibactin          | - | - | + | +         | [31]          |
| Other NRPs         | Dipeptide     | Bacilysin              | + |   | + | -         | [32]          |
| Other NRPs         | cyclohexenone | Chlorotetain           | - | - | + | -         | [33]          |
| Other NRPs         | Polypeptide   | Bacitracin A, F        | - | + | - | -         | [34]          |
| Other NRPs         | Polypeptide   | Mycobacillin           | - | - | + | -         | [35]          |
| Other NRPs         | Dipeptide     | Rhizocticin A          | - | - | + | -         | [36]          |

**Table S2:** Ribosomal peptides (RPs) from *B. subtilis* group.

| RPs Class         | Sub-class     | Metabolite    | Antimicrobial activity |           |                     | References    |
|-------------------|---------------|---------------|------------------------|-----------|---------------------|---------------|
|                   |               |               | Antibacterial activity |           | Antifungal activity |               |
|                   |               |               | Gram +ive              | Gram -ive |                     |               |
| Modified peptides | Lanthibiotics | Entianin      | +                      | -         | -                   | [37,38,39,40] |
| Modified peptides | Lanthibiotics | Ericin A      | +                      | -         | -                   | [41]          |
| Modified peptides | Lanthibiotics | Ericin S      | +                      | -         | -                   | [41,42]       |
| Modified peptides | Lanthibiotics | Subtilin      | +                      | -         | -                   | [41,43]       |
| Modified peptides | Lanthibiotics | Mersacidin    | +                      | -         | -                   | [44]          |
| Modified peptides | Lanthibiotics | Sublancin 168 | +                      | -         | -                   | [45]          |

|                       |                              |               |   |   |   |            |
|-----------------------|------------------------------|---------------|---|---|---|------------|
| Modified peptides     | Lanthibiotics                | Lichenicidin  | + | - | - | [46]       |
| Modified peptides     | Lanthibiotics                | Subtilisin A  | + | + | - | [47,48,49] |
| Modified peptides     | Lanthibiotics                | Subtilomycin  | + | + | + | [50,51]    |
| Others                | Bacteriocin like peptides    | Lichenin      | + | - | - | [48]       |
| Non-modified peptides | Large antimicrobial peptides | Bac 14B       | + | + | + | [49]       |
| Non-modified peptides | Large antimicrobial peptides | Baciamin      | - | - | + | [50]       |
| Modified peptides     | Cyclized peptides            | Amylocyclicin | + | - | - | [52]       |
| Modified peptides     | LAP                          | Sonorensin    | + | + | - | [53]       |
| Modified peptides     | LAP                          | Plantazolicin | + | - | - | [52]       |
| Non-modified peptide  | Large antimicrobial peptide  | CAMT2         | + | + | - | [51]       |
| Non-modified peptide  | Large antimicrobial peptide  | Bacisubin     | - | - | + | [54]       |
| Modified peptides     | Lanthibiotics                | Amylolysin    | + | + | + | [55]       |

**Table S3:** PolyKetides (PKs) from *B. Subtilis*

| PKs Class | Sub-class   | Metabolite                                                | Antibacterial activity |           | Antifungal activity | Other     | References |
|-----------|-------------|-----------------------------------------------------------|------------------------|-----------|---------------------|-----------|------------|
|           |             |                                                           | Gram +ive              | Gram -ive |                     |           |            |
| Polyene   | Macrolactin | 7-O-6'(2"-acetylphenyl)-5'-hydroxyhexanoate macrolactin A | -                      | +         | -                   | -         | [56]       |
| Polyene   | Macrolactin | 7-O-2'E-butenoyl-macrolactin A                            | -                      | -         | +                   | -         | [5]        |
| Polyene   | Macrolactin | Lactones with 3 diene moieties in the carbon              | +                      | -         | -                   | Antiviral | [8]        |

|         |             |                                                                                         |   |   |   |   |      |
|---------|-------------|-----------------------------------------------------------------------------------------|---|---|---|---|------|
|         |             | backbone                                                                                |   |   |   |   |      |
| Polyene | Macrolactin | Gageomacrolactins                                                                       | + | - | - | - | [30] |
| Polyene | Macrolactin | 7- <i>O</i> -methyl-5'-hydroxy-3'-heptenoate-macrolactin A                              | + | + | - | - | [56] |
| Polyene | Macrolactin | 7- <i>O</i> -malonyl-macrolactin A                                                      | + | + | + | - | [8]  |
| Polyene | Macrolactin | 7- <i>O</i> -succinyl-macrolactin F                                                     | + | + | - | - | [57] |
| Polyene | Macrolactin | 7- <i>O</i> -succinyl-macrolactin A                                                     | + | + | + | - | [57] |
| Polyene | Macrolactin | Macrolactin A                                                                           | + | + | + | - | [58] |
| Polyene | Macrolactin | 7- <i>O</i> -2' <i>E</i> -butenoyl macrolactin A                                        | - | - | + | - | [5]  |
| Polyene | Macrolactin | Macrolactin B and C                                                                     | + | - | - | - | [59] |
| Polyene | Macrolactin | Macrolactin D                                                                           | + | + | + | - | [21] |
| Polyene | Macrolactin | Macrolactin F-M                                                                         | + | - | - | - | [57] |
| Polyene | Macrolactin | Macrolactin N                                                                           | + | + | - | - | [31] |
| Polyene | Macrolactin | Macrolactin Q                                                                           | + | + | - | - | [60] |
| Polyene | Macrolactin | Macrolactin S                                                                           | + | + | + | - | [61] |
| Polyene | Macrolactin | Macrolactin T                                                                           | + | - | + | - | [5]  |
| Polyene | Macrolactin | Macrolactin W                                                                           | + | - | - | - | [60] |
| Polyene | -           | Aurantinin B-D                                                                          | + | - | - | - | [62] |
| Polyene | -           | 2-(8-butyl-3-ethyl-3,4,4a,5,6,8a-hexahydro-2H-chromen-6-yl)-ethyl benzoate              | - | + | - | - | [56] |
| Polyene | -           | methoxycarbonyl)-4-(5-(2-ethylbutyl)-5,6-dihydro-3-methyl-2H-pyran-2-yl)-butyl benzoate | - | + | - | - | [56] |
| Polyene | Difficidin  | Macrocyclic                                                                             | + | + | - | - | [63] |

|         |            |                                    |   |   |   |   |      |
|---------|------------|------------------------------------|---|---|---|---|------|
|         |            | polyene lactone<br>phosphate ester |   |   |   |   |      |
| Polyene | Difficidin | Difficidin                         | + | + | - | - | [63] |
| Polyene | Difficidin | Oxydifficidin                      | + | + | - | - | [64] |

**Table S4:** Hybrid (NRP/PK) metabolites from *B. Subtilis*.

| Class   | Sub-class     | Metabolite                  | Antibacterial activity |           | Antifungal activity | Other activity                               | References |
|---------|---------------|-----------------------------|------------------------|-----------|---------------------|----------------------------------------------|------------|
|         |               |                             | Gram +ive              | Gram -ive |                     |                                              |            |
| Hybrid. | Bacillaene.   | Bacillaene A.               | +                      | +         | +                   | -.                                           | [65]..     |
| Hybrid. | Isocoumarins. | N-acetylated amicoumacin B. | -.                     | +         | -.                  | -.                                           | [59] ..    |
| Hybrid. | Isocoumarins. | Amicoumacin A.              | +                      | -.        | -.                  | Anticancer, Antiulcer and Anti-inflammatory. | [5]..      |
| Hybrid. | Isocoumarins. | Amicoumacin A B, C.         | +                      | -.        | -.                  | Anti-inflammatory.                           | [59]..     |
| Hybrid. | Isocoumarins. | AI-77s.                     | +                      | -.        | -.                  | Gastro protective .                          | [66] ..    |
| Hybrid. | Isocoumarins. | Baciphelacin.               | +                      | +         | -..                 |                                              | [67] ..    |
| Hybrid. | Isocoumarins. | Bacilosarcons A and B.      | +                      | +         | -.                  | herbicidal.                                  | [68]..     |
| Hybrid. | Isocoumarins. | Damxungmacin A and B.       | +..                    |           | -.                  | Anticancer.                                  | [69]..     |
| Hybrid. | Isocoumarins. | PM-94128.                   | -.                     | -.        | -.                  | Anticancer.                                  | [70]..     |
| Hybrid. | Isocoumarins. | Hetiamacin A (PJS).         | +                      | -.        | -.                  | -.                                           | [54]..     |
| Hybrid. | Isocoumarins. | Hetiamacin B.               | +                      | -.        | -.                  | -.                                           | [54]..     |
| Hybrid. | Isocoumarins. | Lipoamicoumacins A-D.       | +                      | +         | -.                  | Anticancer.                                  | [5]..      |

**Table S5:** Volatile metabolites from *B. subtilis* group.

| Class              | Sub-class | Metabolite              | Antifungal activity | Antibacterial activity | References |
|--------------------|-----------|-------------------------|---------------------|------------------------|------------|
| Organic metabolite | Acids     | Butanoic acid, 3-methyl | +                   | -                      | [37]       |
| Organic metabolite | Acids     | Gentisic acid           | +                   | -                      | [38]       |
| Organic metabolite | Acids     | n-Hexanoic acid         | -                   | +                      | [39]       |
| Organic metabolite | Acids     | n-Hexadecanoic acid     | +                   | -                      | [38]       |

|                     |             |                                                                                                                                    |   |   |         |
|---------------------|-------------|------------------------------------------------------------------------------------------------------------------------------------|---|---|---------|
| Organic metabolite  | Acids       | Octadecanoic acid, Propanoic acid, 4-hexen-1-yl ester                                                                              | + | - | [54]    |
| Organic metabolite  | Acids       | Oleic acid                                                                                                                         | - | + | [39]    |
| Organic metabolite  | Acids       | Propanoic acid, 2-methyl                                                                                                           | + | - | [37]    |
| Organic metabolite  | Acid        | Isovaleric acid                                                                                                                    | + | - | [71]    |
| Organic metabolites | Acid        | 2-methylbutyric acid                                                                                                               | + | - | [32]    |
| Organic metabolites | Alcohols    | Ethanol                                                                                                                            | + | - | [72]    |
| Organic metabolite  | Alcohols    | 3,4-dimethyl-5-hexen-3-ol, Heptanol                                                                                                | + | - | [54]    |
| Organic metabolite  | Alcohol     | 1-decanol                                                                                                                          | + | - | [73]    |
| Organic metabolite  | Alcohols    | 2-Undecanol                                                                                                                        | + | - | [22]    |
| Organic metabolite  | Alcohols    | 1-Butanol                                                                                                                          | + | - | [37]    |
| Organic metabolite  | Alcohols    | 1-Butanol, 3-methyl-                                                                                                               | + | - | [37,54] |
| Organic metabolite  | Alcohols    | Hexanol,2-ethyl                                                                                                                    | + | - | [63]    |
| Organic metabolite  | Alcohol     | Isoamyl alcohol/3-methyl-1-butanol                                                                                                 | + | - | [71]    |
| Organic metabolite  | Alcohol     | 1-dodecanol                                                                                                                        | + | - | [73]    |
| Organic metabolite  | Alcohol     | 2-ethylhexanol                                                                                                                     | + | - | [74]    |
| Organic metabolite  | Aldehyde    | 2,4-Heptadienal, (E,E)-, 2-Decenal, (E)-, 2-Heptenal, (Z)-, 2-Nonenal, (E)-, 2-Octenal, (E)-, 2-Undecenal, 2,4-Decadienal, Octanal | + | - | [54]    |
| Organic metabolite  | Aldehyde    | Decanal                                                                                                                            | + | - | [58]    |
| Organic metabolite  | Aldehyde    | Nonanal                                                                                                                            | + | - | [39]    |
| Organic metabolites | Hydrocarbon | 5-methyl-2-heptanone                                                                                                               | + | - | [72]    |
| Organic metabolite  | Hydrocarbon | Eicosane, 10-methyl-                                                                                                               | + | - | [63]    |
| Organic metabolite  | Hydrocarbon | Heneicosane                                                                                                                        | + | - | [38]    |
| Organic metabolite  | Hydrocarbon | Heptadecane                                                                                                                        | - | + | [39]    |
| Organic metabolite  | Hydrocarbon | Heptadecane, 2,6,10,15-tetramethyl-                                                                                                | + | - | [63]    |
| Organic metabolite  | Hydrocarbon | Heptane, 2-methyl-7-oxabicyclo[2.2.1]                                                                                              | + | - | [54]    |
| Organic metabolite  | Hydrocarbon | Hexadecane, 2,6,11,15-tetramethyl-                                                                                                 | + | - | [63]    |
| Organic metabolite  | Hydrocarbon | Nonadecane, 9-methyl-                                                                                                              | + | - | [63]    |
| Organic metabolite  | Hydrocarbon | Nonadecane,10-methyl-                                                                                                              | + | - | [63]    |
| Organic metabolite  | Hydrocarbon | Pentadecane                                                                                                                        | + | - | [75]    |
| Organic metabolite  | Hydrocarbon | Pentadecane, 8-hexyl-                                                                                                              | + | - | [63]    |

|                    |             |                                        |   |   |         |
|--------------------|-------------|----------------------------------------|---|---|---------|
| Organic metabolite | Hydrocarbon | Tetradecane                            | + | - | [75]    |
| Organic metabolite | Hydrocarbon | Tetradecane, 2,6,10-trimethyl-         | + | - | [63]    |
| Organic metabolite | Hydrocarbon | Undecane,1,2-methyl                    | + | - | [75]    |
| Organic metabolite | Hydrocarbon | 1H-indene, 1-methylene-                | + | - | [54]    |
| Organic metabolite | Hydrocarbon | 1,3-butadiene                          | + | + | [76]    |
| Organic metabolite | Hydrocarbon | 8-methyl-1-decene                      | + | - | [54]    |
| Organic metabolite | Htdrocarbon | m-tolunitrile                          | + | - | [74]    |
| Organic metabolite | Hydrocarbon | 1,3- pentadiene                        | + | - | [77]    |
| Organic metabolite | Hydrocarbon | 6-methyl-2-heptanone                   | + | - | [74]    |
| Organic metabolite | Benzenoids  | β-Benzeneethanamine                    | + | - | [38]    |
| Organic metabolite | Benzenoids  | 1,2-Benzisothiazol-3(2H)-one           | - | + | [76]    |
| Organic metabolite | Benzenoids  | 2,4-bis(2-Methylpropyl)-phenol         | + | - | [63]    |
| Organic metabolite | Benzenoids  | 2-Phenylethanol                        | - | + | [39]    |
| Organic metabolite | Benzenoids  | 4-Hydroxybenzaldehyde                  | + | + | [76]    |
| Organic metabolite | Benzenoids  | Benzene, 1,2,4,5-tetramethyl           | + | - | [63]    |
| Organic metabolite | Benzenoids  | Benzene, 1,2,4-trimethyl               | + | - | [58]    |
| Organic metabolite | Benzenoids  | Benzene, 1-methyl-4-(1-methylethyl)-   | + | - | [58]    |
| Organic metabolite | Benzenoids  | Benzene, 2-propenyl                    | + | - | [75]    |
| Organic metabolite | Benzenoids  | Benzene,1,4-dichloro                   | + | - | [75]    |
| Organic metabolite | Benzenoids  | Benzothiazole                          | + | - | [74]    |
| Organic metabolite | Benzenoids  | Butylated hydroxytoluene               | + | - | [38]    |
| Organic metabolite | Benzenoids  | Ethylbenzene                           | + | - | [58]    |
| Organic metabolite | Benzenoids  | Phenol, 2,4-bis(1,1-dimethylethyl)     | + | - | [7]     |
| Organic metabolite | Benzenoids  | Phenol, 4,4'-(1-methylethylidene) bis- | - | + | [39]    |
| Organic metabolite | Benzenoids  | Phenol, 4-chloro-3-methyl              | + | - | [7]     |
| Organic metabolite | Benzenoids  | Phenol,2,3,6-trimethyl-                | + | - | [58]    |
| Organic metabolite | Benzenoids  | P-xylene                               | + | - | [58]    |
| Organic metabolite | Benzenoids  | Styrene                                | + | - | [22]    |
| Organic metabolite | Benzenoids  | Toluene                                | + | - | [39]    |
| Organic metabolite | Benzenoids  | Phenol                                 | + | - | [73]    |
| Organic metabolite | Benzenoids  | 2,4-di- <i>tert</i> -butylphenol       | + | + | [7]     |
| Organic metabolite | Benzenoid   | Benzylacetone                          | + | - | [74]    |
| Organic metabolite | Esters      | Ethyl acetate                          | + | - | [37]    |
| Organic metabolite | Ester       | Butyl formate                          | + | - | [71,78] |

|                     |                     |                               |   |   |         |
|---------------------|---------------------|-------------------------------|---|---|---------|
| Organic metabolite  | Ester               | Isopentyl acetate             | + | - | [79]    |
| Organic metabolite  | Furans              | 2-pentyl-furan                | + | - | [54]    |
| Organic metabolite  | Ketone              | 2-nonanone                    | + | - | [74,80] |
| Organic metabolite  | Ketone              | Acetophenone                  | + | - | [74]    |
| Organic metabolites | Ketone              | Methyl isobutyl ketone        | + | - | [72]    |
| Organic metabolite  | Ketone              | Acetoin                       | + | - | [77]    |
| Organic metabolite  | Ketone              | 2-heptanone                   | + | - | [79,80] |
| Organic metabolite  | Ketone              | Butan-2-one                   | + | - | [37]    |
| Organic metabolite  | Ketone              | Butanone, 3-hydroxy-2-        | + | - | [37]    |
| Organic metabolite  | Ketone              | Dodecan-2-one                 | + | - | [38]    |
| Organic metabolite  | Ketone              | Ethanone, 1-(4-methylphenyl)  | + | + | [39]    |
| Organic metabolite  | Ketone              | Pentanone, 2,2,4-trimethyl-3- | - | + | [5]     |
| Organic metabolite  | Ketone              | Propan-2-one                  | + | - | [37]    |
| Organic metabolite  | Ketone              | Tridecan-2-one                | + | - | [39]    |
| Organic metabolite  | Ketone              | 5-methyl-2-hexanone           | + | - | [74]    |
| Organic metabolite  | Nitrogen-containing | 1-ethyl-1H-imidazole          | + | - | [54]    |
| Organic metabolite  | Nitrogen-containing | Ammonium acetate              | + | - | [63]    |
| Organic metabolite  | Nitrogen-containing | 2,5-dimethyl Pyrazine         | + | - | [78]    |
| Organic metabolite  | Nitrogen-containing | 2-ethyl-3,5-dimethyl Pyrazine | + | - | [37]    |
| Organic metabolite  | Nitrogen-containing | Tetramethyl-Pyrazine          | + | - | [63]    |
| Organic metabolite  | Nitrogen-containing | 2,3,5,6-tetramethyl Pyrazine  | + | - | [37]    |
| Organic metabolite  | Nitrogen-containing | S-(-)-2-methylbutylamine      | + | - | [72]    |
| Organic metabolite  | Nitrogen-containing | 2,3-dimethyl pyrazine         | + | - | [71]    |
| Organic metabolite  | Sulphur-containing  | Carbon disulphide             | - | + | [37]    |
| Organic metabolite  | Sulphur-containing  | Dimethyl trisulfide           | + | - | [81]    |
| Organic metabolite  | Hydrocarbon         | Nonane                        | + | - | [71]    |
| Organic metabolite  | Aldehyde            | Benzaldehyde                  | + | - | [73]    |
| Organic metabolite  | Ketones             | Diacetyl/Butane-2,3-dione     | + | - | [71]    |
| Organic metabolite  | Sulphur-containing  | Thiophene                     | + | - | [77]    |

|                       |   |                  |   |   |         |
|-----------------------|---|------------------|---|---|---------|
| Inorganic metabolite  | - | Hydrogen sulfide | + | - | [32]    |
| Inorganic metabolites | - | Hydrogen cyanide | + | - | [73,81] |

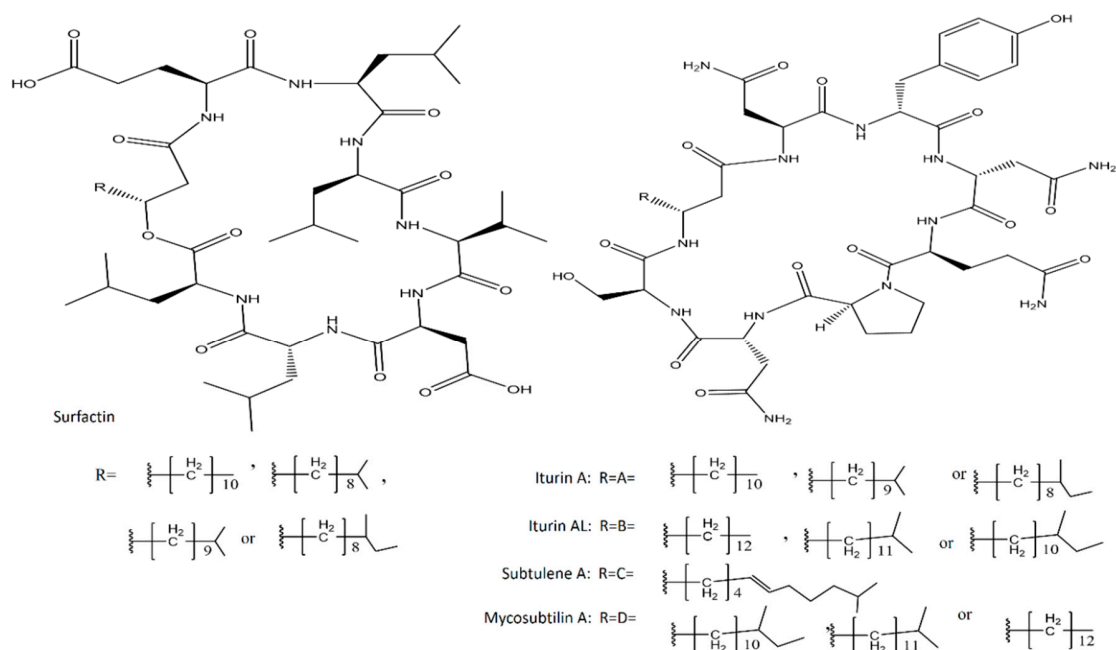

**Figure S1.** Showing various confirmations of surfactin and iturin cyclic lipopeptides.

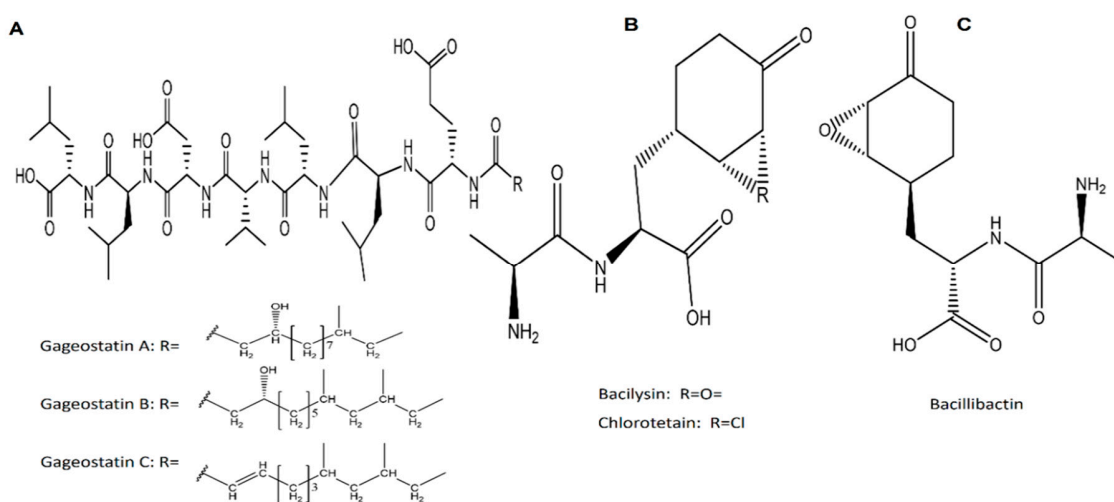

**Figure S2.** Showing molecular structure of gageopeptide (gageostatin A, B and C) (**A**) and siderophore (bacilysin, chlorotetain, and bacillibactin) linear lipopeptide (**B and C**).

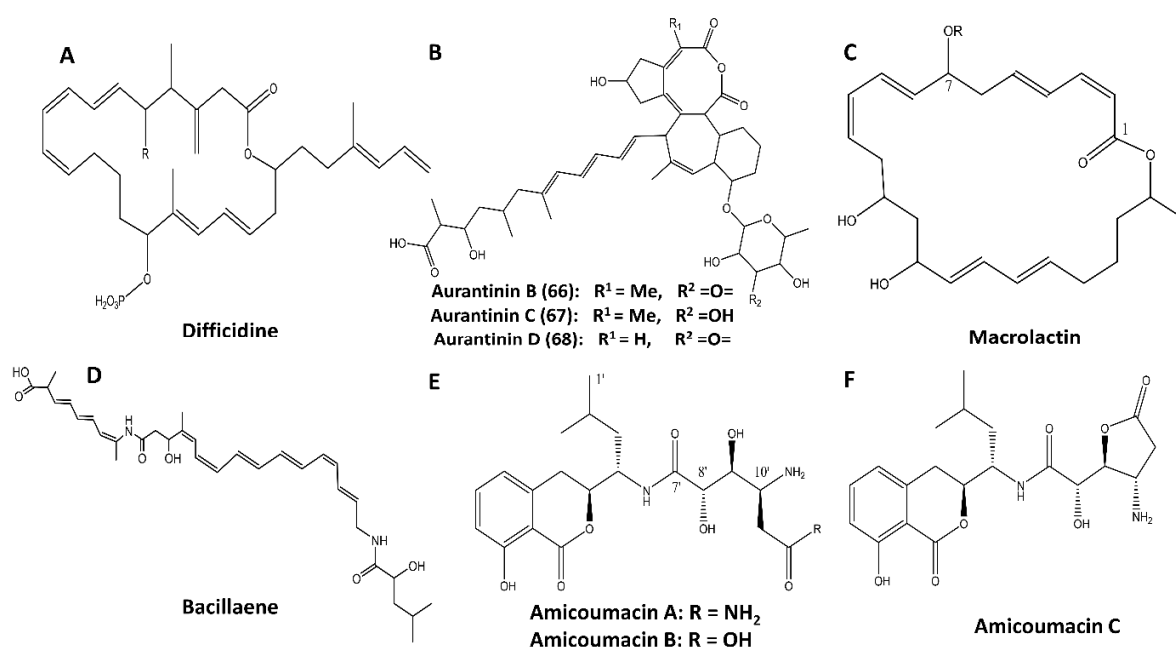

**Figure S3.** Chemical structure of polyketides (PKs), difficidine (A), aurantin (B) and macrolactin (C) and Hybrid NRPs/PKs metabolites bacillaene (D) and amicoumacin A and B (E) and amicoumacin C (F).

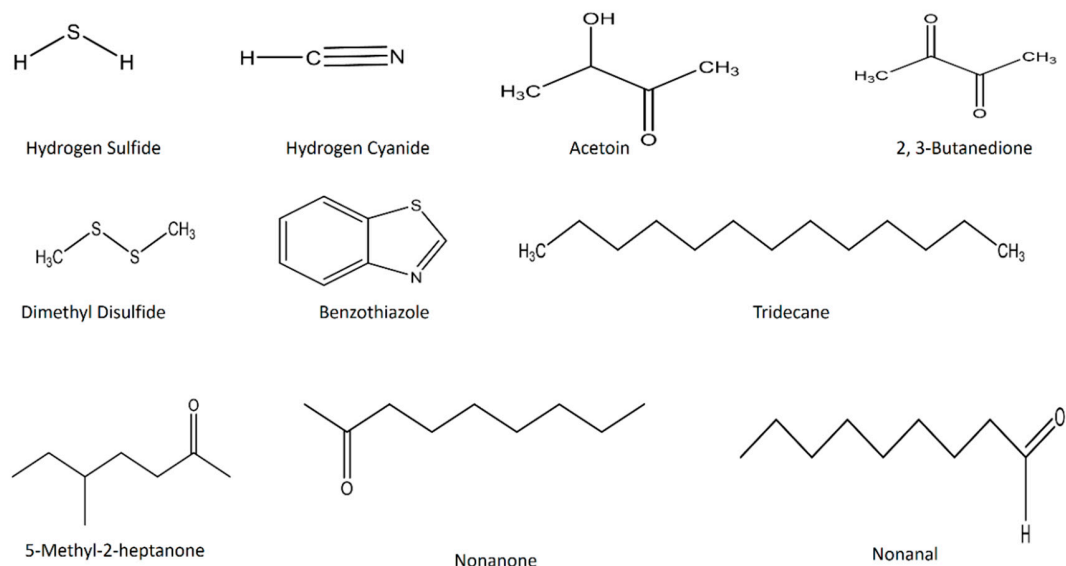

**Figure S4.** Representing structure of volatile bioactive metabolites produced by *B. subtilis* group.

## References

1. Zhao, P.; Quan, C.; Wang, Y.; Wang, J.; Fan, S. *Bacillus amyloliquefaciens* Q-426 as a potential biocontrol agent against *Fusarium oxysporum* f. sp. *spinaciae*. *Journal of Basic Microbiology* **2014**, *54*, 448–456, doi:<https://www.doi.org/10.1002/jobm.201200414>.
2. Cawoy, H.; Debois, D.; Franzil, L.; De Pauw, E.; Thonart, P.; Ongena, M. Lipopeptides as main ingredients for inhibition of fungal phytopathogens by *Bacillus subtilis/amyoliquefaciens*. *Microbial Biotechnology* **2015**, *8*, 281–295, doi:<https://www.doi.org/10.1111/1751-7915.12238>.
3. Zhao, P.; Quan, C.; Wang, Y.; Wang, J.; Fan, S.J.J.o.b.m. *Bacillus amyloliquefaciens* Q-426 as a potential biocontrol agent against *Fusarium oxysporum* f. sp. *spinaciae*. **2014**, *54*, 448–456.
4. Wise, C.; Falardeau, J.; Hagberg, I.; Avis, T.J. Cellular Lipid Composition Affects Sensitivity of Plant Pathogens to Fengycin, an Antifungal Compound Produced by *Bacillus subtilis* Strain CU12. *Phytopathology* **2014**, *104*, 1036–1041, doi:<https://www.doi.org/10.1094/PHYTO-12-13-0336-R>.
5. Li, L.; Ma, M.; Huang, R.; Qu, Q.; Li, G.; Zhou, J.; Zhang, K.; Lu, K.; Niu, X.; Luo, J. Induction of Chlamydospore Formation in *Fusarium* by Cyclic Lipopeptide Antibiotics from *Bacillus subtilis* C2. *Journal of Chemical Ecology* **2012**, *38*, 966–974, doi:<https://www.doi.org/10.1007/s10886-012-0171-1>.
6. Malfanova, N.; Franzil, L.; Lugtenberg, B.; Chebotar, V.; Ongena, M. Cyclic lipopeptide profile of the plant-beneficial endophytic bacterium *Bacillus subtilis* HC8. *Archives of Microbiology* **2012**, *194*, 893–899, doi:<https://www.doi.org/10.1007/s00203-012-0823-0>.
7. Gao, L.; Han, J.; Liu, H.; Qu, X.; Lu, Z.; Bie, X. Plipastatin and surfactin coproduction by *Bacillus subtilis* pB2-L and their effects on microorganisms. *Antonie van Leeuwenhoek* **2017**, *110*, 1007–1018, doi:<https://www.doi.org/10.1007/s10482-017-0874-y>.
8. Romero, D.; de Vicente, A.; Rakotoaly, R.H.; Dufour, S.E.; Veening, J.-W.; Arrebola, E.; Cazorla, F.M.; Kuipers, O.P.; Paquot, M.; Pérez-García, A. The Iturin and Fengycin Families of Lipopeptides Are Key Factors in Antagonism of *Bacillus subtilis* Toward *Podosphaera fusca*. *Molecular Plant-Microbe Interactions* **2007**, *20*, 430–440, doi:<https://www.doi.org/10.1094/MPMI-20-4-0430>.
9. Raubitschek, F.; Dostrovsky, A. An Antibiotic Active against Dermatophytes, Derived from *Bacillus Subtilis*. *Dermatology* **1950**, *100*, 45–49, doi:<https://www.doi.org/10.1159/000257151>.
10. Moyne, A.-L.; Shelby, R.; Cleveland, T.E.; Tuzun, S. Bacillomycin D: An iturin with antifungal activity against *Aspergillus flavus*. *Journal of Applied Microbiology* **2001**, *90*, 622–629, doi:<https://www.doi.org/10.1046/j.1365-2672.2001.01290.x>.
11. Lee, S.-C.; Kim, S.-H.; Park, I.-H.; Chung, S.-Y.; Choi, Y.-L. Isolation and structural analysis of bamylocin A, novel lipopeptide from *Bacillus amyloliquefaciens* LP03 having

- antagonistic and crude oil-emulsifying activity. *Archives of Microbiology* **2007**, *188*, 307–312, doi:<https://www.doi.org/10.1007/s00203-007-0250-9>.
12. Thimon, L.; Peyoux, F.; Maget-Dana, R.; Michel, G. Surface-active properties of antifungal lipopeptides produced by *Bacillus subtilis*. *Journal of the American Oil Chemists Society* **1992**, *69*, 92–93, doi:<https://www.doi.org/10.1007/bf02635884>.
  13. Besson, F.; PEYPOUX, F.; MICHEL, G.; DELCAMBE, L. Characterization of iturin A in antibiotics from various strains of *Bacillus subtilis*. *The Journal of antibiotics* **1976**, *29*, 1043–1049, doi:<https://www.doi.org/10.7164/antibiotics.29.1043>.
  14. Dunlap, C.A.; Schisler, D.A.; Price, N.P.; Vaughn, S.F. Cyclic lipopeptide profile of three *Bacillus subtilis* strains; antagonists of *Fusarium* head blight. *The Journal of Microbiology* **2011**, *49*, 603, doi:<https://www.doi.org/10.1007/s12275-011-1044-y>.
  15. Leclère, V.; Béchet, M.; Adam, A.; Guez, J.-S.; Wathelet, B.; Ongena, M.; Thonart, P.; Gancel, F.; Chollet-Imbert, M.; Jacques, P. Mycosubtilin Overproduction by *Bacillus subtilis* BBG100 Enhances the Organism's Antagonistic and Biocontrol Activities. *Applied and Environmental Microbiology* **2005**, *71*, 4577–4584, doi:<https://www.doi.org/10.1128/aem.71.8.4577-4584.2005>.
  16. Thasana, N.; Prapagdee, B.; Rangkadilok, N.; Sallabhan, R.; Aye, S.L.; Ruchirawat, S.; Loprasert, S. *Bacillus subtilis* SSE4 produces subtilene A, a new lipopeptide antibiotic possessing an unusual C15 unsaturated  $\beta$ -amino acid. *FEBS Letters* **2010**, *584*, 3209–3214, doi:<https://www.doi.org/10.1016/j.febslet.2010.06.005>.
  17. Lee, D.W.; Kim, B.S. Antimicrobial Cyclic Peptides for Plant Disease Control. *The Plant Pathology Journal* **2015**, *31*, 1–11, doi:<https://www.doi.org/10.5423/PPJ.RW.08.2014.0074>.
  18. Hsieh, F.-C.; Lin, T.-C.; Meng, M.; Kao, S.-S. Comparing Methods for Identifying *Bacillus* Strains Capable of Producing the Antifungal Lipopeptide Iturin A. *Current Microbiology* **2008**, *56*, 1–5, doi:<https://www.doi.org/10.1007/s00284-007-9003-x>.
  19. Jenny, K.; Käppeli, O.; Fiechter, A. Biosurfactants from *Bacillus licheniformis*: Structural analysis and characterization. *Applied Microbiology and Biotechnology* **1991**, *36*, 5–13, doi:<https://www.doi.org/10.1007/bf00164690>.
  20. Yakimov, M.M.; Timmis, K.N.; Wray, V.; Fredrickson, H.L. Characterization of a new lipopeptide surfactant produced by thermotolerant and halotolerant subsurface *Bacillus licheniformis* BAS50. *Applied and Environmental Microbiology* **1995**, *61*, 1706–1713, doi: .
  21. Luo, C.; Liu, X.; Zhou, X.; Guo, J.; Truong, J.; Wang, X.; Zhou, H.; Li, X.; Chen, Z. Unusual biosynthesis and structure of locillomycins from *Bacillus subtilis* 916. *Applied and Environmental Microbiology* **2015**, doi:<https://www.doi.org/10.1128/aem.01639-15>.
  22. Qi, G.; Zhu, F.; Du, P.; Yang, X.; Qiu, D.; Yu, Z.; Chen, J.; Zhao, X. Lipopeptide induces apoptosis in fungal cells by a mitochondria-dependent pathway. *Peptides* **2010**, *31*, 1978–1986, doi:<https://www.doi.org/10.1016/j.peptides.2010.08.003>.
  23. Naruse, N.; Tenmyo, O.; Kobaru, S.; Kamei, H.; Miyaki, T.; Konishi, M.; Oki, T. Pumilacidin, a complex of new antiviral antibiotics. *The Journal of antibiotics* **1990**, *43*, 267–280, doi:<https://www.doi.org/10.7164/antibiotics.43.267>.
  24. Bais, H.P.; Fall, R.; Vivanco, J.M. Biocontrol of *Bacillus subtilis* against Infection of *Arabidopsis* Roots by *Pseudomonas syringae* Is Facilitated by Biofilm Formation and Surfactin Production. *Plant Physiology* **2004**, *134*, 307–319, doi:<https://www.doi.org/10.1104/pp.103.028712>.

25. Preecha, C.; Sadowsky, M.J.; Prathuangwong, S. Lipopeptide surfactin produced by *Bacillus amyloliquefaciens* KPS46 is required for biocontrol efficacy against *Xanthomonas axonopodis* pv. *Glycines*. *Kasetsart Journal, Natural Sciences* **2010**, Vol.44 No.1, pp.84-99 doi: .
26. Dimkić, I.; Živković, S.; Berić, T.; Ivanović, Ž.; Gavrilović, V.; Stanković, S.; Fira, D. Characterization and evaluation of two *Bacillus* strains, SS-12.6 and SS-13.1, as potential agents for the control of phytopathogenic bacteria and fungi. *Biological Control* **2013**, 65, 312–321, doi:https://www.doi.org/10.1016/j.biocontrol.2013.03.012.
27. Romano, A.; Vitullo, D.; Senatore, M.; Lima, G.; Lanzotti, V. Antifungal Cyclic Lipopeptides from *Bacillus amyloliquefaciens* Strain BO5A. *Journal of Natural Products* **2013**, 76, 2019–2025, doi:https://www.doi.org/10.1021/np400119n.
28. Sabaté, D.C.; Audisio, M.C. Inhibitory activity of surfactin, produced by different *Bacillus subtilis* subsp. *subtilis* strains, against *Listeria monocytogenes* sensitive and bacteriocin-resistant strains. *Microbiological Research* **2013**, 168, 125–129, doi:https://www.doi.org/10.1016/j.micres.2012.11.004.
29. Sharma, S.; Pandey, L.M. Production of biosurfactant by *Bacillus subtilis* RSL-2 isolated from sludge and biosurfactant mediated degradation of oil. *Bioresource Technology* **2020**, 307, 123261.
30. Tareq, F.S.; Lee, M.A.; Lee, H.-S.; Lee, J.-S.; Lee, Y.-J.; Shin, H.J. Gageostatins A–C, antimicrobial linear lipopeptides from a marine *Bacillus subtilis*. *Marine Drugs* **2014**, 12, 871–885.
31. Yu, X.; Ai, C.; Xin, L.; Zhou, G. The siderophore-producing bacterium, *Bacillus subtilis* CAS15, has a biocontrol effect on *Fusarium* wilt and promotes the growth of pepper. *European Journal of Soil Biology* **2011**, 47, 138–145, doi:https://www.doi.org/10.1016/j.ejsobi.2010.11.001.
32. Wu, L.; Wu, H.; Chen, L.; Xie, S.; Zang, H.; Borriss, R.; Gao, X. Bacilysin from *Bacillus amyloliquefaciens* FZB42 has Specific Bactericidal Activity against Harmful Algal Bloom Species. *Applied and Environmental Microbiology* **2014**, doi:https://www.doi.org/10.1128/aem.02605-14.
33. Zuber, P.; Nakano, M.M.; Marahiel, M.A. Peptide Antibiotics. In *Bacillus subtilis and Other Gram-Positive Bacteria*; American Society of Microbiology: 1993.
34. Hussein, A.; AL-Janabi, S. Identification of bacitracin produced by local isolate of *Bacillus licheniformis*. *African journal of Biotechnology* **2006**, 5.
35. Majumdar, S.K.; Bose, S.K. Mycobacillin, a New Antifungal Antibiotic produced by *B. subtilis*. *Nature* **1958**, 181, 134, doi:https://www.doi.org/10.1038/181134a0.
36. Kugler, M.; Loeffler, W.; Rapp, C.; Kern, A.; Jung, G. Rhizocticin A, an antifungal phosphono-oligopeptide of *Bacillus subtilis* ATCC 6633: Biological properties. *Archives of Microbiology* **1990**, 153, 276–281, doi:https://www.doi.org/10.1007/bf00249082.
37. Chaves-López, C.; Serio, A.; Gianotti, A.; Sacchetti, G.; Ndagijimana, M.; Ciccarone, C.; Stellarini, A.; Corsetti, A.; Paparella, A. Diversity of food-borne *Bacillus* volatile compounds and influence on fungal growth. *Journal of Applied Microbiology* **2015**, 119, 487–499, doi:https://www.doi.org/10.1111/jam.12847.
38. Zheng, M.; Shi, J.; Shi, J.; Wang, Q.; Li, Y. Antimicrobial effects of volatiles produced by two antagonistic *Bacillus* strains on the anthracnose pathogen in postharvest mangos. *Biological Control* **2013**, 65, 200–206, doi:https://www.doi.org/10.1016/j.biocontrol.2013.02.004.

39. Raza, W.; Ling, N.; Yang, L.; Huang, Q.; Shen, Q. Response of tomato wilt pathogen *Ralstonia solanacearum* to the volatile organic compounds produced by a biocontrol strain *Bacillus amyloliquefaciens* SQR-9. *Scientific Reports* **2016**, *6*, 24856, doi:https://www.doi.org/10.1038/srep24856.
40. Fuchs, S.W.; Jaskolla, T.W.; Bochmann, S.; Kötter, P.; Wichelhaus, T.; Karas, M.; Stein, T.; Entian, K.-D. Entianin, a Novel Subtilin-Like Lantibiotic from *Bacillus subtilis* DSM 15029<sup>T</sup> with High Antimicrobial Activity. *Applied and Environmental Microbiology* **2011**, doi:https://www.doi.org/10.1128/aem.01962-10.
41. Stein, T.; Borchert, S.; Conrad, B.; Feesche, J.; Hofemeister, B.; Hofemeister, J.; Entian, K.-D. Two different lantibiotic-like peptides originate from the ericin gene cluster of *Bacillus subtilis* A1/3. *J Bacteriol* **2002**, *184*, 1703–1711, doi:https://www.doi.org/10.1128/JB.184.6.1703-1711.2002.
42. Agrios, G.N. 1 - INTRODUCTION TO PLANT PATHOLOGY. In *Plant Pathology (Third Edition)*, Agrios, G.N., Ed.; Academic Press: 1988; pp. 3-39.
43. Heinzmann, S.; Entian, K.-D.; Stein, T. Engineering *Bacillus subtilis* ATCC 6633 for improved production of the lantibiotic subtilin. *Applied Microbiology and Biotechnology* **2006**, *69*, 532–536, doi:https://www.doi.org/10.1007/s00253-005-0023-9.
44. Brötz, H.; Bierbaum, G.; Markus, A.; Molitor, E.; Sahl, H.G. Mode of action of the lantibiotic mersacidin: Inhibition of peptidoglycan biosynthesis via a novel mechanism? *Antimicrobial Agents and Chemotherapy* **1995**, *39*, 714–719, doi:https://www.doi.org/10.1128/aac.39.3.714.
45. Paik, S.H.; Chakicherla, A.; Hansen, J.N. Identification and Characterization of the Structural and Transporter Genes for, and the Chemical and Biological Properties of, Sublancin 168, a Novel Lantibiotic Produced by *Bacillus subtilis* 168. *Journal of Biological Chemistry* **1998**, *273*, 23134–23142, doi:https://www.doi.org/10.1074/jbc.273.36.23134.
46. Begley, M.; Cotter, P.D.; Hill, C.; Ross, R.P. Identification of a Novel Two-Peptide Lantibiotic, Lichenicidin, following Rational Genome Mining for LanM Proteins. *Applied and Environmental Microbiology* **2009**, *75*, 5451–5460, doi:https://www.doi.org/10.1128/aem.00730-09.
47. Shelburne, C.E.; An, F.Y.; Dholpe, V.; Ramamoorthy, A.; Lopatin, D.E.; Lantz, M.S. The spectrum of antimicrobial activity of the bacteriocin subtilisin A. *Journal of Antimicrobial Chemotherapy* **2007**, *59*, 297–300, doi:https://www.doi.org/10.1093/jac/dkl495.
48. Pattnaik, P.; Kaushik, J.K.; Grover, S.; Batish, V.K. Purification and characterization of a bacteriocin-like compound (Lichenin) produced anaerobically by *Bacillus licheniformis* isolated from water buffalo. *Journal of Applied Microbiology* **2001**, *91*, 636–645, doi:https://www.doi.org/10.1046/j.1365-2672.2001.01429.x.
49. Hammami, I.; Jaouadi, B.; Bacha, A.B.; Rebai, A.; Bejar, S.; Nesme, X.; Rhouma, A. *Bacillus subtilis* bacteriocin Bac 14B with a broad inhibitory spectrum: Purification, amino acid sequence analysis, and physicochemical characterization. *Biotechnology and Bioengineering* **2012**, *17*, 41–49, doi:https://www.doi.org/10.1007/s12257-010-0401-8.
50. Wong, J.H.; Hao, J.; Cao, Z.; Qiao, M.; Xu, H.; Bai, Y.; Ng, T.B. An antifungal protein from *Bacillus amyloliquefaciens*. *Journal of Applied Microbiology* **2008**, *105*, 1888–1898, doi:https://www.doi.org/10.1111/j.1365-2672.2008.03917.x.

51. Phelan, R.W.; Barret, M.; Cotter, P.D.; O'Connor, P.M.; Chen, R.; Morrissey, J.P.; Dobson, A.D.; O'Gara, F.; Barbosa, T.M. Subtilomycin: A new lantibiotic from *Bacillus subtilis* strain MMA7 isolated from the marine sponge *Haliclona simulans*. *Marine drugs* **2013**, *11*, 1878–1898.
52. Scholz, R.; Vater, J.; Budiharjo, A.; Wang, Z.; He, Y.; Dietel, K.; Schwecke, T.; Herfort, S.; Lasch, P.; Borriss, R. Amylocyclicin, a novel circular bacteriocin produced by *Bacillus amyloliquefaciens* FZB42. *J Bacteriol* **2014**, *196*, 1842–1852.
53. Chopra, L.; Singh, G.; Kumar Jena, K.; Sahoo, D.K. Sonorensin: A new bacteriocin with potential of an anti-biofilm agent and a food biopreservative. *Scientific reports* **2015**, *5*, 1–13.
54. Liu, W.-W.; Wei, M.; Zhu, B.-Y.; Du, Y.-C.; Feng, L. Antagonistic activities of volatiles from four strains of *Bacillus* spp. and *Paenibacillus* spp. against soil-borne plant pathogens. *Agricultural Sciences in China* **2008**, *7*, 1104–1114.
55. Arguelles Arias, A.; Ongena, M.; Devreese, B.; Terrak, M.; Joris, B.; Fickers, P. Characterization of amylolysin, a novel lantibiotic from *Bacillus amyloliquefaciens* GA1. *PLoS One* **2013**, *8*, e83037.
56. Chakraborty, K.; Thilakan, B.; Kizhakkekalam, V. Antibacterial aryl-crowned polyketide from *Bacillus subtilis* associated with seaweed *Anthophycus longifolius*. *Journal of applied microbiology* **2018**, *124*, 108–125.
57. Romero-Tabarez, M.; Jansen, R.; Sylla, M.; Lünsdorf, H.; Häußler, S.; Santosa, D.A.; Timmis, K.N.; Molinari, G. 7-O-malonyl macrolactin A, a new macrolactin antibiotic from *Bacillus subtilis* active against methicillin-resistant *Staphylococcus aureus*, Vancomycin-resistant enterococci, and a small-colony variant of *Burkholderia cepacia*. *Antimicrobial Agents and Chemotherapy* **2006**, *50*, 1701–1709.
58. Yuan, J.; Raza, W.; Shen, Q.; Huang, Q. Antifungal activity of *Bacillus amyloliquefaciens* NJN-6 volatile compounds against *Fusarium oxysporum* f. sp. *cubense*. *Applied and environmental microbiology* **2012**, *78*, 5942–5944.
59. Arbsuwan, N.; Payoungkiattikun, W.; Sirithorn, P.; Daduang, S.; Jangpromma, N.; Dhiravisit, A.; Hahm, Y.T.; Neubert, L.K.; Klaynongsruang, S. Purification and characterization of macrolactins and amicoumacins from *Bacillus licheniformis* BFP011: A new source of food antimicrobial substances. *CyTA-Journal of Food* **2018**, *16*, 50–60.
60. MONDOL, M.M.; Ju, L.Y.; Seok, L.J.; Jae, S.H. Macrolactin Antibiotics from a Marine-derived Bacterium *Bacillus* sp. 102CH635-3. **2011**, 281–281.
61. Liu, C.; Lu, J.; Lu, L.; Liu, Y.; Wang, F.; Xiao, M. Isolation, structural characterization and immunological activity of an exopolysaccharide produced by *Bacillus licheniformis* 8-37-0-1. *Bioresource technology* **2010**, *101*, 5528–5533.
62. Yang, S.; Du, G.; Chen, J.; Kang, Z. Characterization and application of endogenous phase-dependent promoters in *Bacillus subtilis*. *Applied microbiology and biotechnology* **2017**, *101*, 4151–4161.
63. Chen, H.; Xiao, X.; Wang, J.; Wu, L.; Zheng, Z.; Yu, Z. Antagonistic effects of volatiles generated by *Bacillus subtilis* on spore germination and hyphal growth of the plant pathogen, *Botrytis cinerea*. *Biotechnology letters* **2008**, *30*, 919–923.
64. Zimmerman, S.B.; Schwartz, C.D.; Monaghan, R.L.; Pelak, B.A.; Weissberger, B.; Gilfillan, E.C.; Mochales, S.; HERNANDEZ, S.; CURRIE, S.A.; TEJERA, E. Difficidin and Oxydifficidin: Novel broad spectrum antibacterial antibiotics produced by *Bacillus*

- subtilis* I. Production, taxonomy and antibacterial activity. *The Journal of Antibiotics* **1987**, *40*, 1677–1681.
65. Müller, S.; Strack, S.N.; Hoefler, B.C.; Straight, P.D.; Kearns, D.B.; Kirby, J.R. Bacillaene and sporulation protect *Bacillus subtilis* from predation by *Myxococcus xanthus*. *Applied and environmental microbiology* **2014**, *80*, 5603–5610.
  66. Shimojima, Y.; Hayashi, H.; Ooka, T.; Shibukawa, M.; Iitaka, Y. Studies on AI-77s, microbial products with gastroprotective activity. Structures and the chemical nature of AI-77s. *Tetrahedron* **1984**, *40*, 2519–2527.
  67. Okazaki, W.; Akiba, T.; Horikoshi, K.; Akahoshi, R. Production and properties of two types of xylanases from alkalophilic thermophilic *Bacillus* spp. *Applied microbiology and biotechnology* **1984**, *19*, 335–340.
  68. Miwa, H.; Ahmed, I.; Yokota, A.; Fujiwara, T. *Lysinibacillus parviboronicapiens* sp. nov., a low-boron-containing bacterium isolated from soil. *International Journal of Systematic and Evolutionary Microbiology* **2009**, *59*, 1427–1432.
  69. Tang, Q.; Yin, K.; Qian, H.; Zhao, Y.; Wang, W.; Chou, S.-H.; Fu, Y.; He, J. Cyclic di-GMP contributes to adaption and virulence of *Bacillus thuringiensis* through a riboswitch-regulated collagen adhesion protein. *Scientific reports* **2016**, *6*, 1–12.
  70. Canedo, V.; Benavides, J.; Golmirzaie, A.; Cisneros, F.; Ghislain, M.; Lagnaoui, A. Assessing Bt-transformed potatoes for potato tuber moth, *Phthorimaea operculella* (Zeller), management. *CIP Program Report* **1997**, 1989.
  71. Calvo, H.; Mendiara, I.; Arias, E.; Gracia, A.P.; Blanco, D.; Venturini, M.E. Antifungal activity of the volatile organic compounds produced by *Bacillus velezensis* strains against postharvest fungal pathogens. *Postharvest Biology and Technology* **2020**, *166*, 111208.
  72. Iqbal, S., Vollmers, J., & Janjua, H. A. (2021). Genome mining and comparative genome analysis revealed niche-specific genome expansion in antibacterial *Bacillus pumilus* strain SF-4. *Genes*, *12*(7), 1060.
  73. Khan, A.; Gupta, A.; Singh, P.; Mishra, A.K.; Ranjan, R.K.; Srivastava, A. Siderophore-assisted cadmium hyperaccumulation in *Bacillus subtilis*. *International Microbiology* **2020**, *23*, 277–286.
  74. Zhang, D.; Yu, S.; Yang, Y.; Zhang, J.; Zhao, D.; Pan, Y.; Fan, S.; Yang, Z.; Zhu, J. Antifungal effects of volatiles produced by *Bacillus subtilis* against *Alternaria solani* in potato. *Frontiers in microbiology* **2020**, *11*, 1196.
  75. Wang, T.; Liang, Y.; Wu, M.; Chen, Z.; Lin, J.; Yang, L. Natural products from *Bacillus subtilis* with antimicrobial properties. *Chinese Journal of Chemical Engineering* **2015**, *23*, 744–754.
  76. Tahir, H.A.S.; Gu, Q.; Wu, H.; Niu, Y.; Huo, R.; Gao, X. *Bacillus* volatiles adversely affect the physiology and ultra-structure of *Ralstonia solanacearum* and induce systemic resistance in tobacco against bacterial wilt. *Scientific Reports* **2017**, *7*, 40481, doi:<https://www.doi.org/10.1038/srep40481>.
  77. Gotor-Vila, A.; Teixidó, N.; Di Francesco, A.; Usall, J.; Ugolini, L.; Torres, R.; Mari, M. Antifungal effect of volatile organic compounds produced by *Bacillus amyloliquefaciens* CPA-8 against fruit pathogen decays of cherry. *Food Microbiology* **2017**, *64*, 219–225, doi:<https://www.doi.org/10.1016/j.fm.2017.01.006>.
  78. Haidar, R.; Roudet, J.; Bonnard, O.; Dufour, M.C.; Corio-Costet, M.F.; Fert, M.; Gautier, T.; Deschamps, A.; Fermaud, M. Screening and modes of action of antagonistic bacteria to control the fungal pathogen *Phaeomoniella chlamydospora* involved in grapevine

- trunk diseases. *Microbiological Research* **2016**, *192*, 172–184, doi:<https://www.doi.org/10.1016/j.micres.2016.07.003>.
79. Xie, S.; Liu, J.; Gu, S.; Chen, X.; Jiang, H.; Ding, T. Antifungal activity of volatile compounds produced by endophytic *Bacillus subtilis* DZSY21 against *Curvularia lunata*. *Annals of microbiology* **2020**, *70*, 1–10.
  80. Wu, G.; Liu, S.; Wang, T.; Jiang, Z.; Lv, K.; Wang, Y.; Sun, C. Total synthesis of originally proposed and revised structure of hetiamacin A. *Organic letters* **2018**, *20*, 3566–3569.
  81. Giorgio, A.; De Stradis, A.; Lo Cantore, P.; Iacobellis, N.S. Biocide effects of volatile organic compounds produced by potential biocontrol rhizobacteria on *Sclerotinia sclerotiorum*. *Frontiers in microbiology* **2015**, *6*, 1056.
